# Supplementary material
Source: PubMed Central journal article supplement (PMC6825556)

**Fig. S1 Induction of neuroendocrine characteristics upon enzalutamide treatment and/or androgen withdrawal of LNCaP cell line**

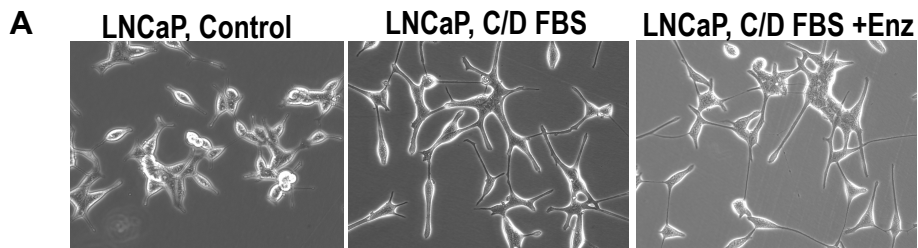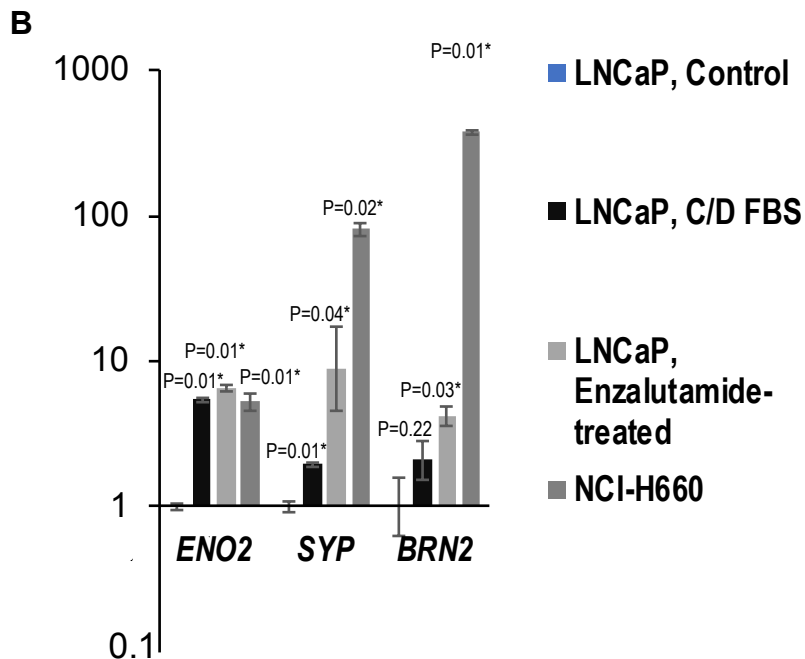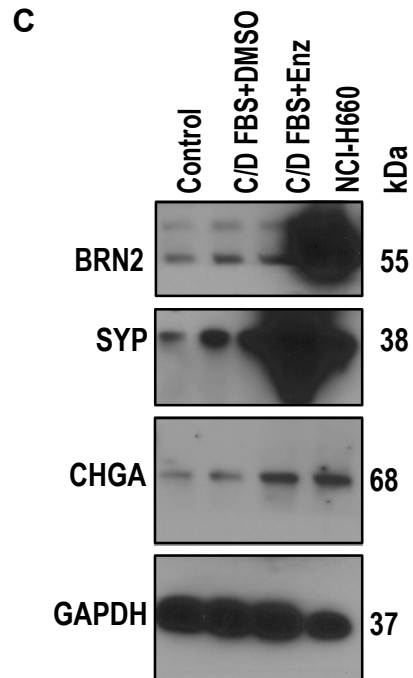

Supplement: NIHMS1536351-supplement-2.pdf [file NIHMS1536351-supplement-2.pdf]
