# Supplementary material
Source: PubMed Central journal article supplement (PMC6825556)
Supplement: NIHMS1536351-supplement-3.pdf [file NIHMS1536351-supplement-3.pdf]

**Fig. S2 Correlation of EV-associated BRN4 and BRN2 with clinicopathological parameters of mCRPC**

| Parameter*                                   | Total<br>n (%) | Relative EV-BRN4 expression |             | P-value  | Total<br>n (%) | Relative EV-BRN2 expression |             | P-value  |
|----------------------------------------------|----------------|-----------------------------|-------------|----------|----------------|-----------------------------|-------------|----------|
|                                              |                | ≤median exp                 | >median exp |          |                | ≤median exp                 | >median exp |          |
| <b><u>ENZ treatment</u></b>                  |                |                             |             |          |                |                             |             |          |
| No                                           | 31/37 (84)     | 16/31 (52)                  | 15/31 (48)  | P=0.4186 | 35/41 (85)     | 20/35 (57)                  | 15/35 (43)  | P=0.0703 |
| Yes                                          | 6/37 (16)      | 2/6 (33)                    | 4/6 (67)    |          | 6/41 (15)      | 1/6 (17)                    | 5/6 (83)    |          |
| <b><u>Gleason score of primary tumor</u></b> |                |                             |             |          |                |                             |             |          |
| < or equal to 7                              | 22/37 (59)     | 9/22 (41)                   | 13/22 (59)  | P=0.9653 | 23/41 (56)     | 12/23 (52)                  | 11/23 (48)  | P=0.5574 |
| 8                                            | 2/37 (5)       | 1/2 (50)                    | 1/2 (50)    |          | 3/41 (7)       | 2/3 (67)                    | 1/3 (33)    |          |
| 9-10                                         | 10/37 (27)     | 4/10 (40)                   | 6/10 (60)   |          | 11/41 (27)     | 4/11 (36)                   | 7/11 (64)   |          |
| <b><u>Age at diagnosis</u></b>               |                |                             |             |          |                |                             |             |          |
| 40-49                                        | 2/37 (5)       | 1/2 (50)                    | 1/2 (50)    | P=0.0910 | 2/41 (5)       | -                           | 2/2 (100)   | P=0.3228 |
| 50-59                                        | 5/37 (14)      | 2/5 (40)                    | 3/5 (60)    |          | 5/41 (12)      | 3/5 (60)                    | 2/5 (40)    |          |
| 60-69                                        | 17/37 (46)     | 9/17 (53)                   | 8/17 (47)   |          | 20/41 (49)     | 12/20 (60)                  | 8/20 (40)   |          |
| 70-79                                        | 13/37 (35)     | 5/13 (38)                   | 8/13 (62)   |          | 13/41 (32)     | 6/13 (46)                   | 7/13 (54)   |          |
| 80-89                                        | -              | -                           | -           |          | 1/41 (2)       | 1/1 (100)                   | -           |          |
| <b><u>Final Serum PSA</u></b>                |                |                             |             |          |                |                             |             |          |
| < or equal to median (433.6)                 | 17/37 (46)     | 7/17 (41)                   | 10/17 (59)  | P=0.9429 | 19/41 (46)     | 9/19 (47)                   | 10/19 (53)  | P=0.6507 |
| >median                                      | 20/37 (54)     | 8/20 (40)                   | 12/20 (60)  |          | 22/41 (54)     | 12/22 (55)                  | 10/22 (45)  |          |

\*Gleason score unknown for 3 cases
