# Supplementary material
Source: PubMed Central journal article supplement (PMC6825556)
Supplement: NIHMS1536351-supplement-6.pdf [file NIHMS1536351-supplement-6.pdf]

**Table S1 Clinicopathologic characteristics of metastatic CRPC patients (Cohort 1+2).**

| <b>Characteristic</b>                           | <b>CRPC-Adeno (N=42)</b> | <b>CRPC-NE(N=6)</b> |
|-------------------------------------------------|--------------------------|---------------------|
|                                                 | <b>N (%)</b>             | <b>N (%)</b>        |
| <b>Age, Years</b>                               |                          |                     |
| Mean                                            | 65                       | 63                  |
| Median                                          | 65                       | 63                  |
| Range                                           | 45-80                    | 59-69               |
| <b>Race</b>                                     |                          |                     |
| Black                                           | -                        | -                   |
| White                                           | 36 (86)                  | 6 (100)             |
| Others (Asian, Hispanic)                        | 6 (14)                   | -                   |
| <b>Gleason Score of Primary Prostate Cancer</b> |                          |                     |
| 4-6                                             | 5 (12)                   | -                   |
| 7                                               | 2 (4.8)                  | 2 (33)              |
| 7 (3+4)                                         | 7 (17)                   | -                   |
| 7 (4+3)                                         | 9 (21.9)                 | -                   |
| 8-10                                            | 15 (36)                  | 4 (67)              |
| Unknown                                         | 4 (9.5)                  | -                   |
| <b>Final serum PSA (ng/mL)</b>                  |                          |                     |
| Median                                          | 1452.9 (0.72->15000)     | 3.33 (0.15-8.85)    |
| <b>M-stage</b>                                  |                          |                     |
| M1                                              | 42 (100)                 | 6 (100)             |
| <b>Metastatic sites of extracted tissues</b>    |                          |                     |
| Lung                                            | 3 (7.1)                  | 2 (33)              |
| Liver                                           | 10 (23.8)                | 1 (17)              |

|                                                                                                                                                                                        |           |        |
|----------------------------------------------------------------------------------------------------------------------------------------------------------------------------------------|-----------|--------|
| Lymph Node                                                                                                                                                                             | 13 (30.9) | -      |
| <b>Other metastatic sites</b> (Skin, -<br>-dura, retroperitoneal lymph node,<br>retroperitoneal, periaortic<br>lymph node, spleen, omentum,<br>cortical, pelvic lymph node, diaphragm) | 16 (38)   | 3 (50) |
| <b>Therapies</b>                                                                                                                                                                       |           |        |
| Enzalutamide                                                                                                                                                                           | 6 (14.3)  | 2 (33) |
| No Enzalutamide                                                                                                                                                                        | 36 (85.7) | 4 (67) |
| <b>Other therapies</b>                                                                                                                                                                 |           |        |
| Abiraterone                                                                                                                                                                            | 8         | 2      |
| Casodex                                                                                                                                                                                | 30        | 6      |
| Lupron                                                                                                                                                                                 | 36        | 6      |
| Zoladex                                                                                                                                                                                | 3         | -      |
| Flutamide                                                                                                                                                                              | 11        | 1      |
| Provenge                                                                                                                                                                               | 5         | 1      |
