# Supplementary material
Source: PubMed Central journal article supplement (PMC6825556)

Fig. S4 Release of oncogenic NE factors in prostate cancer EVs upon Enz treatment

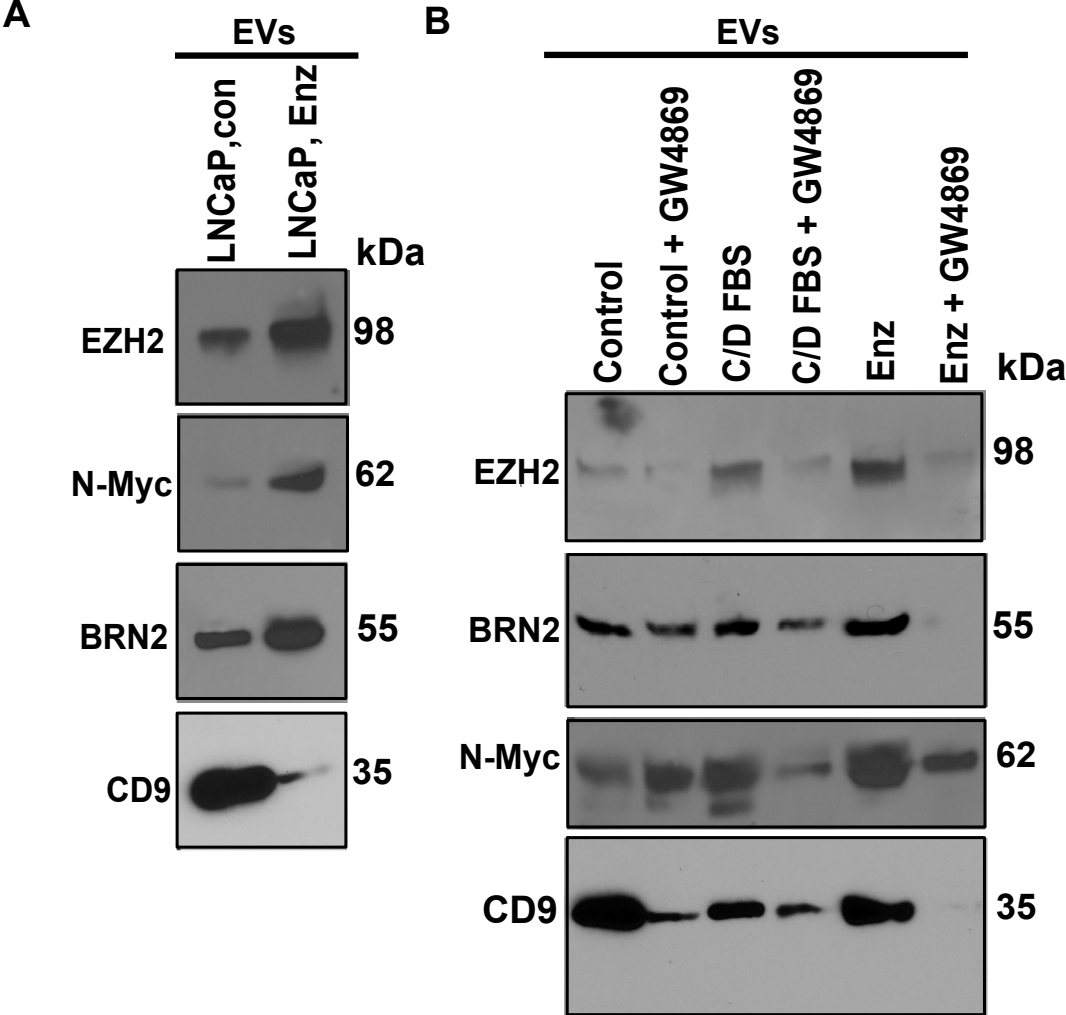

Supplement: NIHMS1536351-supplement-5.pdf [file NIHMS1536351-supplement-5.pdf]
